# Supplementary material for: Salivary glycopatterns as potential biomarkers for diagnosis of gastric cancer
Source: PubMed Central journal article supplement (PMC5482611; doi:10.18632/oncotarget.16082), 2017-03-10
Supplement: oncotarget-08-35718-s001.pdf [file oncotarget-08-35718-s001.pdf]

# Salivary glycopatterns as potential biomarkers for diagnosis of gastric cancer

## Supplementary Materials

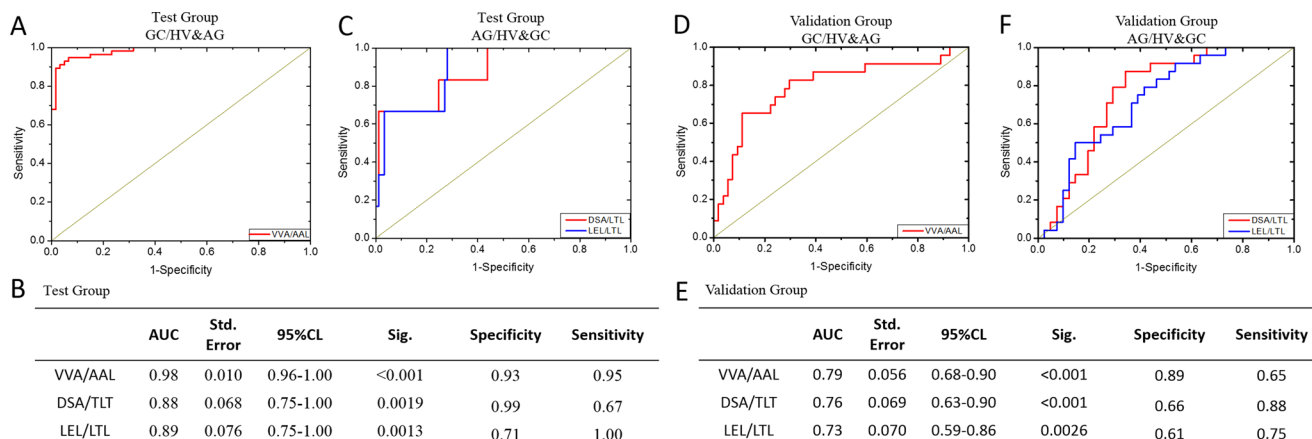

**Supplementary Figure 1: The diagnosis accuracy of the ratio strategy analyzed by ROC analysis.** (A) The ROC analysis of VVA/AAL in the test group. (B) The detail information of the ROC analysis for the in the test group. (C) The ROC analysis of DSA/LTL and LEL/LTL in the test group. (D) The ROC analysis of VVA/AAL in the Validation group. (E) The detail information of the ROC analysis in the Validation group. (F) The ROC analysis of DSA/LTL and LEL/LTL in the Validation group.

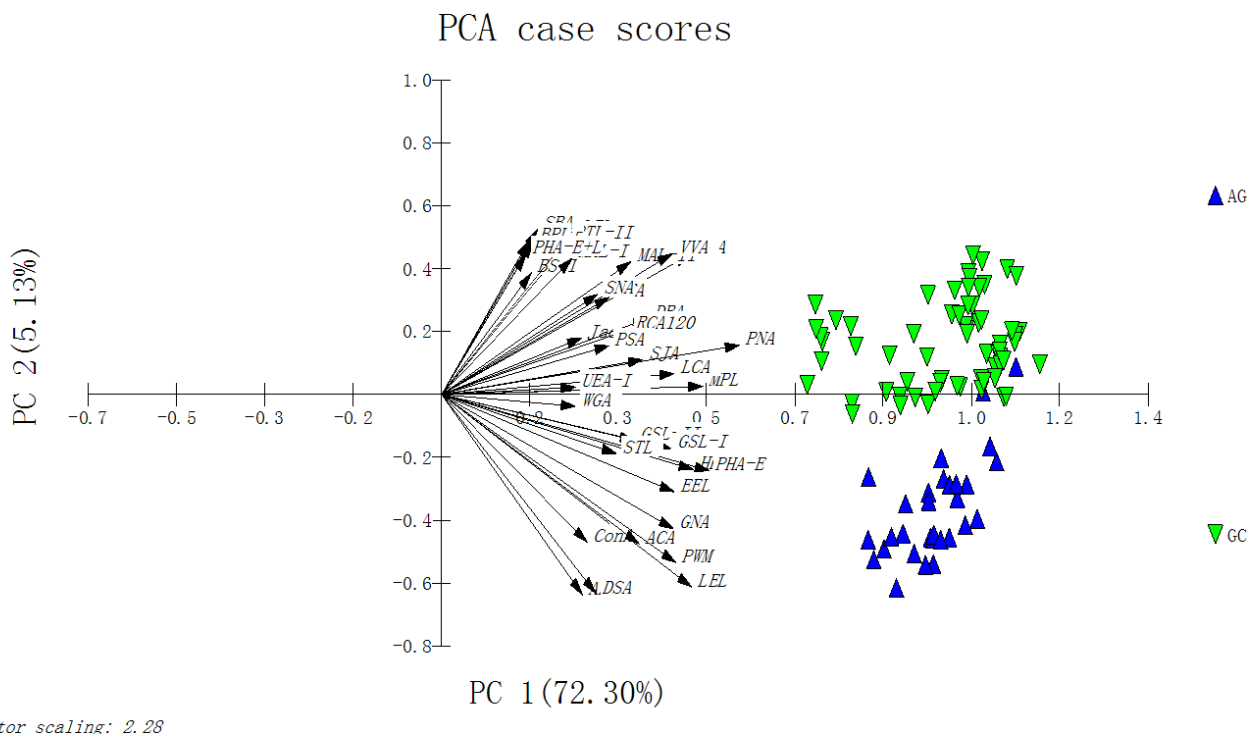

**Supplementary Figure 2: The result of PCA analysis between AG and GC.**
